# Supplementary material
Source: PubMed Central journal article supplement (PMC1544206)

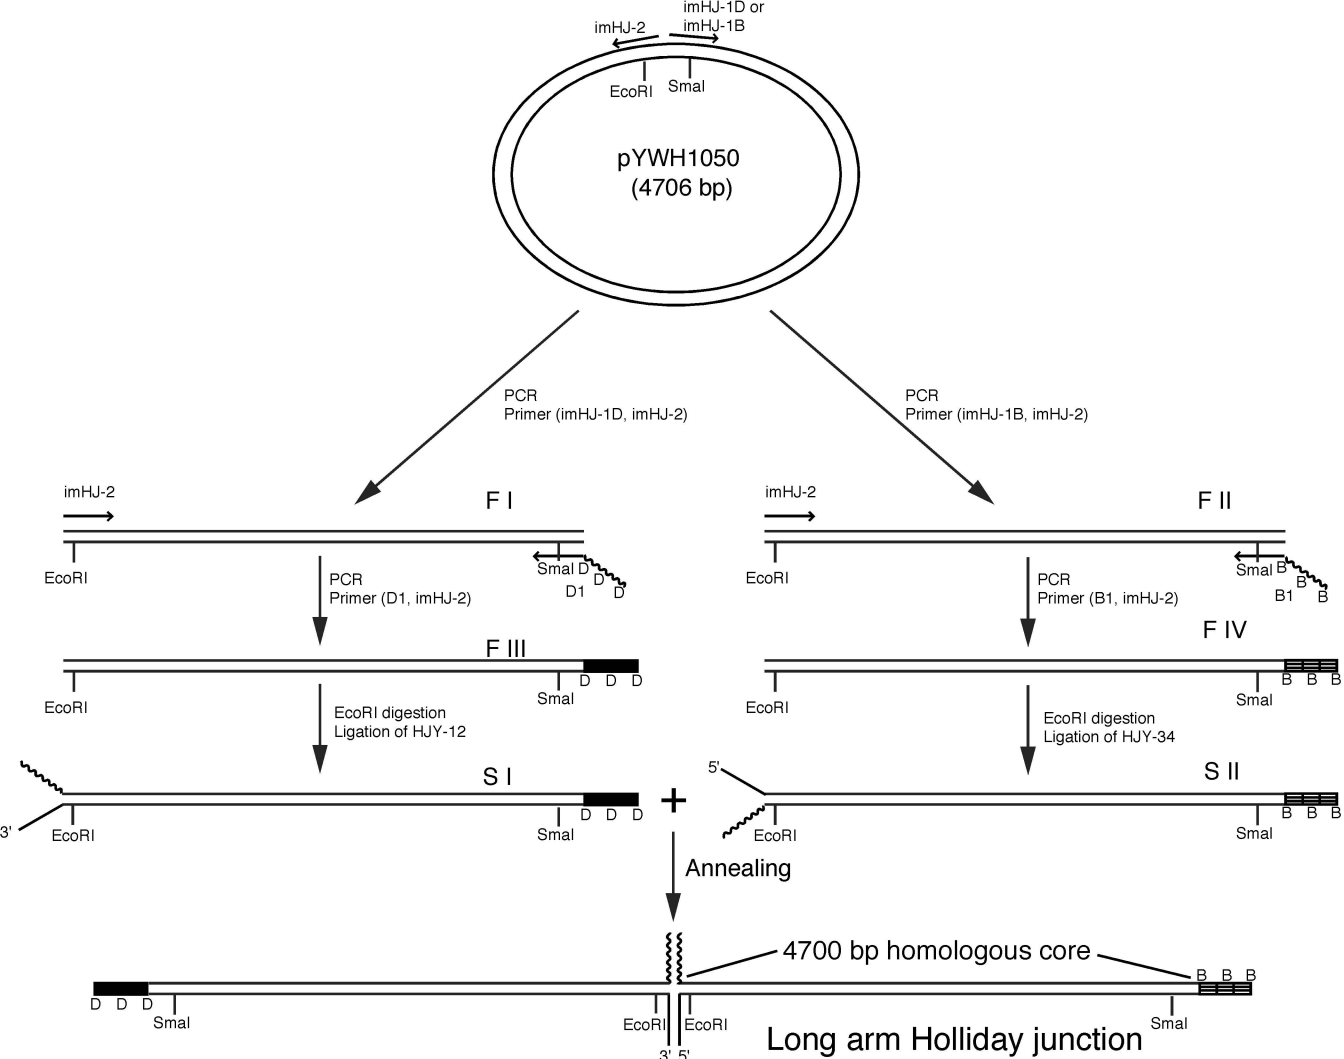

Supplement: pnas_0600753103_1.pdf [file pnas_0600753103_1.pdf]

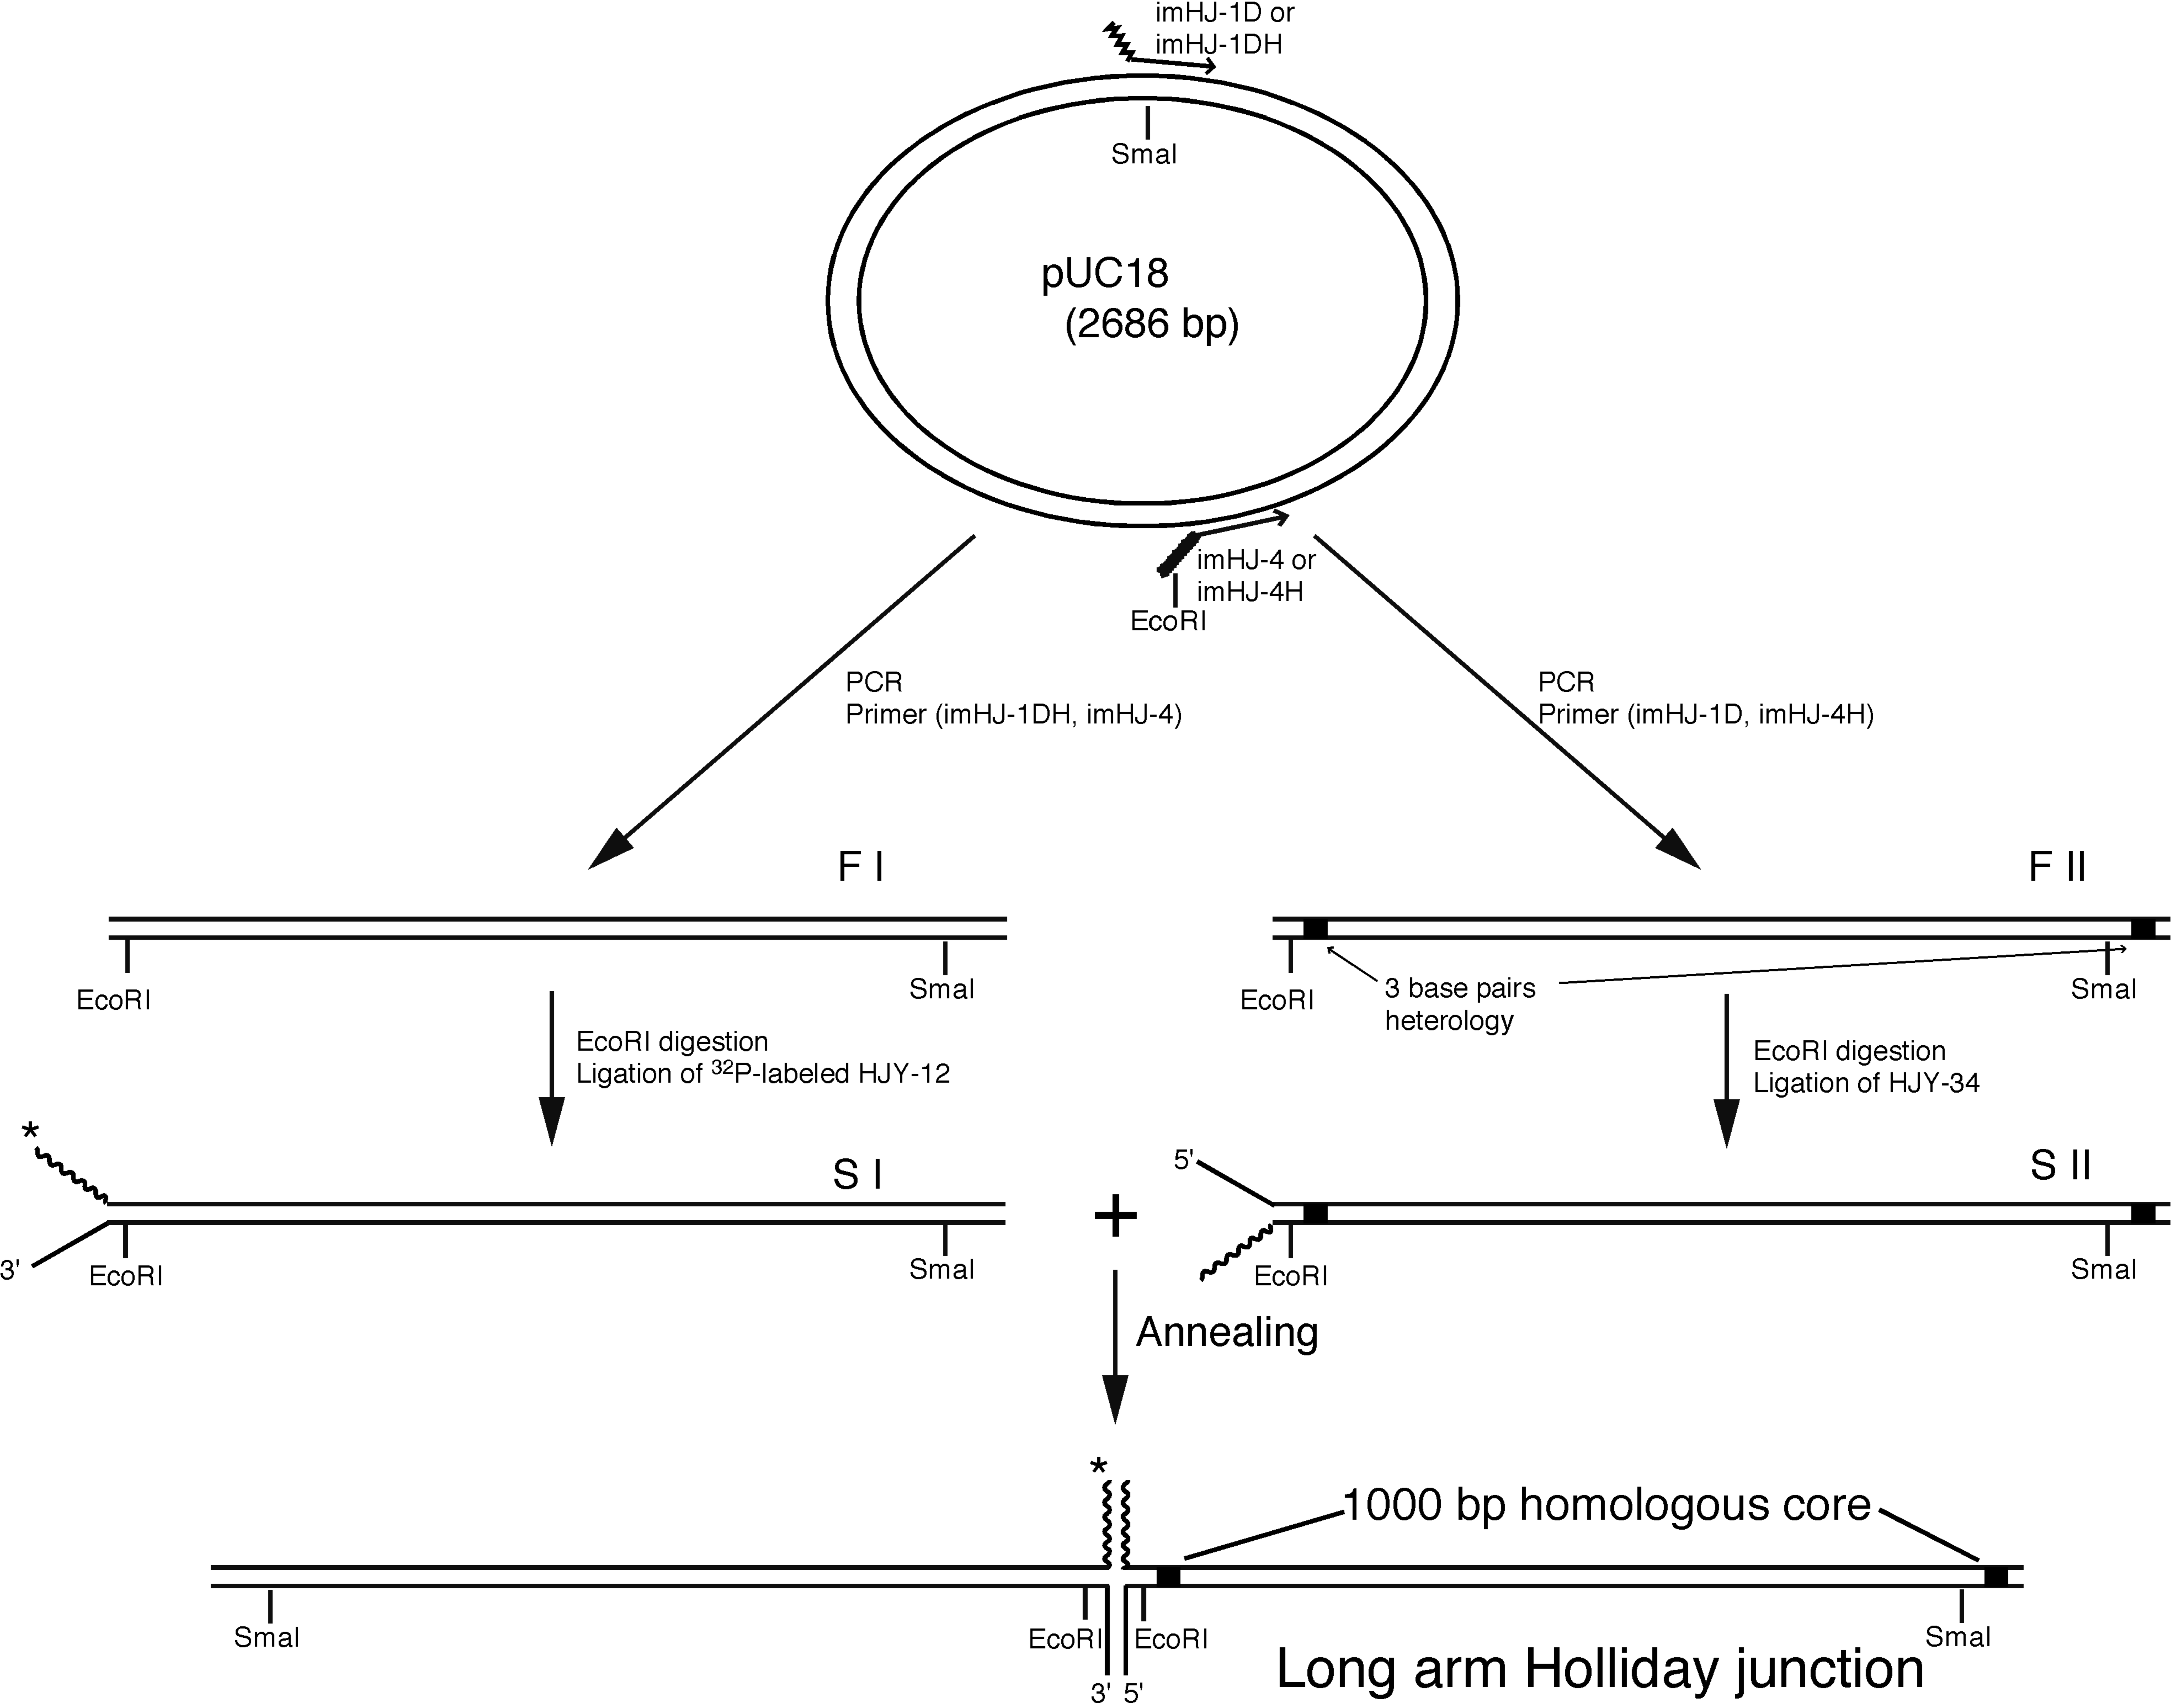

Supplement: pnas_0600753103_2.pdf [file pnas_0600753103_2.pdf]

A 0 15 30 45 60 75 90 105 120 135 150 165 180 195 210 (s)

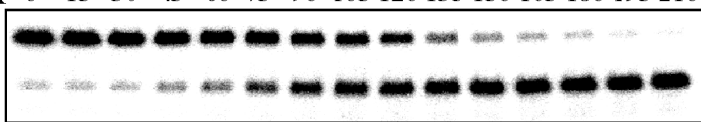

B

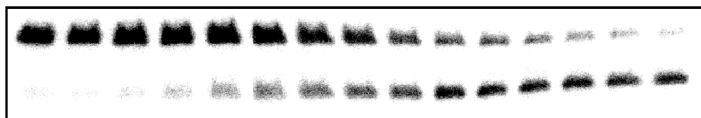

C

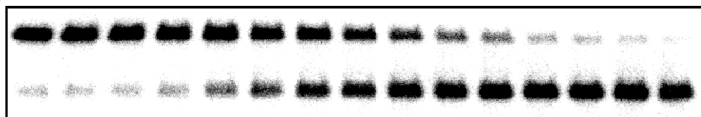

D

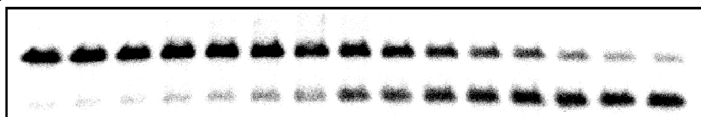

E

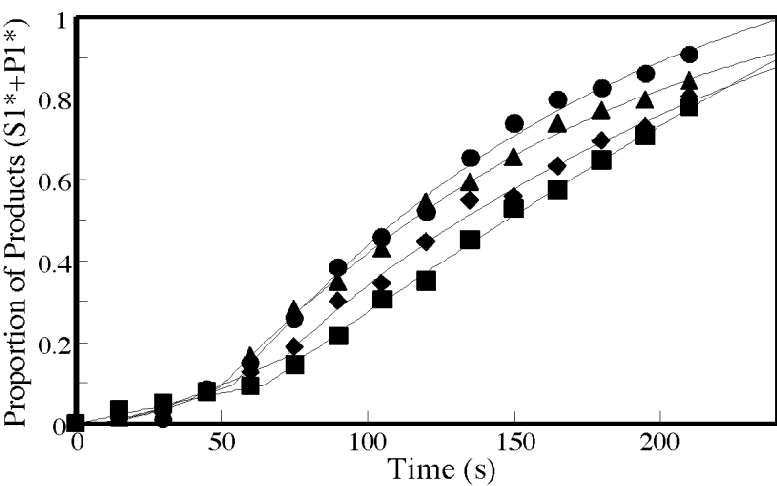

F

|   |                     |
|---|---------------------|
| A | $21 \pm 3.0$ (bp/s) |
| B | $15 \pm 1.0$        |
| C | $21 \pm 1.5$        |
| D | $16 \pm 1.5$        |

Supplement: pnas_0600753103_3.pdf [file pnas_0600753103_3.pdf]
